# Supplementary material for: Cost-effectiveness analysis of mHealth applications for depression in Germany using a Markov cohort simulation
Source: PubMed Central journal article supplement (PMC11570631; doi:10.1038/s41746-024-01324-0), 2024-11-17
Supplement: 41746_2024_1324_MOESM1_ESM.pdf [file 41746_2024_1324_MOESM1_ESM.pdf]

## Supplementary Table 1: Best practice recommendations of the ISPOR-SMDM Modeling Good Research Practices Task Force-3 for State-Transition Modeling<sup>1</sup>

| Best practice recommendations |                                                                                                                                                                                                                                                                                                                                                                                                                                                                                                                                                                                                         | Implementation in our study                                                                                                                                               |
|-------------------------------|---------------------------------------------------------------------------------------------------------------------------------------------------------------------------------------------------------------------------------------------------------------------------------------------------------------------------------------------------------------------------------------------------------------------------------------------------------------------------------------------------------------------------------------------------------------------------------------------------------|---------------------------------------------------------------------------------------------------------------------------------------------------------------------------|
| III-1: Choice of model type   | If the decision problem can be represented with a manageable number of health states that incorporate all characteristics relevant to the decision problem, including the relevant history, a cohort simulation should be chosen because of its transparency, efficiency, ease of debugging, and ability to conduct specific value of information analyses. If, however, a valid representation of any aspect of the decision problem would lead to an unmanageable number of states, then an individual-level state-transition model is recommended. Validity should not be sacrificed for simplicity. | We modeled our decision problem with five health states: mild depression, moderate depression, severe depression, remission and death.                                    |
| <b>MODEL STRUCTURE</b>        |                                                                                                                                                                                                                                                                                                                                                                                                                                                                                                                                                                                                         |                                                                                                                                                                           |
| III-2: Problem statement      | The strategies being evaluated should be clearly defined. In particular, sequential decisions should not be modeled within the Markov cycle tree but rather be part of the specification of the alternative intervention strategies that precede the Markov tree.                                                                                                                                                                                                                                                                                                                                       | We defined three treatment scenarios:<br>Treatment 1: Without DiGA scenario; Treatment 2: With DiGA scenario standard of care and Treatment 3: With DiGA future scenario. |
| III-3: Starting Cohort        | The starting cohort should be defined by the demographic and clinical characteristics that affect the transition probabilities or state values (e.g., quality of life and cost).                                                                                                                                                                                                                                                                                                                                                                                                                        | The starting cohort was derived from the current prevalence of depression in Germany.                                                                                     |
| III-4: Defining states        | Specification of states and transitions should generally reflect the biological/theoretical understanding of the disease or condition being modeled.                                                                                                                                                                                                                                                                                                                                                                                                                                                    | We built on existing research to derive health states and transition probabilities.                                                                                       |
| III-5: Intervention effects   | States should adequately capture the type of intervention (i.e., prevention, screening, diagnostics, treatment) as well as the intervention's benefits and harms.                                                                                                                                                                                                                                                                                                                                                                                                                                       | DiGA focus on the treatment of depression. After symptoms have improved, DiGA have also a preventive effect against a relapse.                                            |
| III-6: Heterogeneity          | States need to be homogeneous with respect to both observed and unobserved (i.e., not known by the decision maker) characteristics that affect transition probabilities.                                                                                                                                                                                                                                                                                                                                                                                                                                | NA                                                                                                                                                                        |
| III-7: Time horizon           | The time horizon for the model should be sufficiently large to capture all health effects and costs relevant to the decision problem.                                                                                                                                                                                                                                                                                                                                                                                                                                                                   | We chose a 5-year simulation horizon.                                                                                                                                     |
| III-8: Cycle length           | Cycle length should be short enough to represent the frequency of clinical events and interventions.                                                                                                                                                                                                                                                                                                                                                                                                                                                                                                    | We chose a cycle length of 3 months since the digital health applications in scope (DiGA) are usually prescribed on a quarterly basis in                                  |

|                                    |                                                                                                                                                                                                                                        |                                                                                                |
|------------------------------------|----------------------------------------------------------------------------------------------------------------------------------------------------------------------------------------------------------------------------------------|------------------------------------------------------------------------------------------------|
|                                    |                                                                                                                                                                                                                                        | Germany.                                                                                       |
| III-9: Model symmetry              | Components of state-transition models that reflect similar clinical courses should not be recreated but rather should be incorporated once and linked to that structure throughout the model.                                          | The model structure is provided in the supplementary material.                                 |
| <b>DATA</b>                        |                                                                                                                                                                                                                                        |                                                                                                |
| III-10: Data sources               | Transition probabilities and intervention effects should be derived from the most representative data sources for the decision problem.                                                                                                | Description can be found in the manuscript including an overview table of all input variables. |
| III-11: Parameter derivation       | All methods and assumptions used to derive transition probabilities and intervention effects should be described.                                                                                                                      | Description can be found in the manuscript including an overview table of all input variables. |
| III-12: Intervention effects       | All parameters relating to the effectiveness of interventions derived from observational studies should be correctly controlled for confounding. Time-varying confounding is of particular concern in estimating intervention effects. | NA                                                                                             |
| III-13: State valuation            | The valuation of intermediate outcomes/states should be justified.                                                                                                                                                                     | Description can be found in the manuscript including an overview table of all input variables. |
| <b>ANALYSIS</b>                    |                                                                                                                                                                                                                                        |                                                                                                |
| III-14: Half-cycle correction      | A half-cycle correction should be applied to costs and effectiveness in the first cycle and in the final cycle if not using a lifetime horizon.                                                                                        | We applied half-cycle correction to costs and QALYs.                                           |
| III-15: Analyzing distributions    | For certain decision problems, it may be important to report not only the expected value but also the distribution of the outcomes of interest.                                                                                        | Exemplary distributions for selected input variables were provided and analysed.               |
| III-16: Performing microsimulation | The number of individuals simulated should be large enough to generate stable estimates of the expected values.                                                                                                                        | Our simulation cohort accounts for 4,977 million people.                                       |
| <b>COMMUNICATING RESULTS</b>       |                                                                                                                                                                                                                                        |                                                                                                |
| III-17: Presenting the model       | The report should use nontechnical language and clear figures and tables that enhance understanding of the STM to communicate its key structural elements, assumptions, and parameters.                                                | Results are described in the manuscript.                                                       |
| III-18: Presenting results         | In addition to final outcomes, intermediate outcomes that enhance the understanding and transparency of the model results should also be presented.                                                                                    | Results are described in the manuscript.                                                       |

NA= Not applicable

**Supplementary Table 2: CHEERS 2022 Checklist<sup>2</sup>**

| Item                          | Guidance for Reporting                                                                                                            | Reported in section                                                                                            |
|-------------------------------|-----------------------------------------------------------------------------------------------------------------------------------|----------------------------------------------------------------------------------------------------------------|
| <b>TITLE</b>                  |                                                                                                                                   |                                                                                                                |
| Title                         | 1 Identify the study as an economic evaluation and specify the interventions being compared.                                      | See Page 1                                                                                                     |
| <b>ABSTRACT</b>               |                                                                                                                                   |                                                                                                                |
| Abstract                      | 2 Provide a structured summary that highlights context, key methods, results and alternative analyses.                            | See Page 1                                                                                                     |
| <b>INTRODUCTION</b>           |                                                                                                                                   |                                                                                                                |
| Background and objectives     | 3 Give the context for the study, the study question and its practical relevance for decision making in policy or practice.       | "Introduction"                                                                                                 |
| <b>METHODS</b>                |                                                                                                                                   |                                                                                                                |
| Health economic analysis plan | 4 Indicate whether a health economic analysis plan was developed and where available.                                             | NA                                                                                                             |
| Study population              | 5 Describe characteristics of the study population (such as age range, demographics, socioeconomic, or clinical characteristics). | "Exemplary input parameters"                                                                                   |
| Setting and location          | 6 Provide relevant contextual information that may influence findings.                                                            | "Model selection and structure", "Base case input data and sensitivity analysis", "Exemplary input parameters" |
| Comparators                   | 7 Describe the interventions or strategies being compared and why chosen.                                                         | "Model selection and structure"                                                                                |
| Perspective                   | 8 State the perspective(s) adopted by the study and why chosen.                                                                   | "Model selection and structure", "Base case input data and sensitivity analysis"                               |
| Time horizon                  | 9 State the time horizon for the study and why appropriate.                                                                       | "Exemplary input parameters"                                                                                   |
| Discount rate                 | 10 Report the discount rate(s) and reason chosen.                                                                                 | Table 2                                                                                                        |
| Selection of outcomes         | 11 Describe what outcomes were used as the measure(s) of benefit(s) and harm(s).                                                  | "Base case input data and sensitivity analysis", "Exemplary input parameters"                                  |

|                                                                       |    |                                                                                                                                                                             |                                                                                                                |
|-----------------------------------------------------------------------|----|-----------------------------------------------------------------------------------------------------------------------------------------------------------------------------|----------------------------------------------------------------------------------------------------------------|
|                                                                       |    |                                                                                                                                                                             |                                                                                                                |
| Measurement of outcomes                                               | 12 | Describe how outcomes used to capture benefit(s) and harm(s) were measured.                                                                                                 | "Base case input data and sensitivity analysis",<br>"Exemplary input parameters"                               |
| Valuation of outcomes                                                 | 13 | Describe the population and methods used to measure and value outcomes.                                                                                                     | NA                                                                                                             |
| Measurement and valuation of resources and costs                      | 14 | Describe how costs were valued.                                                                                                                                             | "Exemplary input parameters" + Table 2                                                                         |
| Currency, price date, and conversion                                  | 15 | Report the dates of the estimated resource quantities and unit costs, plus the currency and year of conversion.                                                             | Table 2                                                                                                        |
| Rationale and description of model                                    | 16 | If modelling is used, describe in detail and why used. Report if the model is publicly available and where it can be accessed.                                              | "Model selection and structure", "Base case input data and sensitivity analysis"                               |
| Analytics and assumptions                                             | 17 | Describe any methods for analysing or statistically transforming data, any extrapolation methods, and approaches for validating any model used.                             | "Model selection and structure", "Base case input data and sensitivity analysis", "Exemplary input parameters" |
| Characterizing heterogeneity                                          | 18 | Describe any methods used for estimating how the results of the study vary for sub-groups.                                                                                  | NA                                                                                                             |
| Characterizing distributional effects                                 | 19 | Describe how impacts are distributed across different individuals or adjustments made to reflect priority populations.                                                      | NA                                                                                                             |
| Characterizing uncertainty                                            | 20 | Describe methods to characterize any sources of uncertainty in the analysis.                                                                                                | "Base case input data and sensitivity analysis"                                                                |
| Approach to engagement with patients and others affected by the study | 21 | Describe any approaches to engage patients or service recipients, the general public, communities, or stakeholders (e.g., clinicians or payers) in the design of the study. | NA                                                                                                             |
| <b>RESULTS</b>                                                        |    |                                                                                                                                                                             |                                                                                                                |
| Study parameters                                                      | 22 | Report all analytic inputs (e.g., values, ranges, references) including uncertainty or distributional assumptions.                                                          | Table 2                                                                                                        |
| Summary of main results                                               | 23 | Report the mean values for the main categories of costs and outcomes of interest and summarise them in the most appropriate overall measure.                                | Table 1                                                                                                        |

|                                                                      |    |                                                                                                                                                                          |                                                                                  |
|----------------------------------------------------------------------|----|--------------------------------------------------------------------------------------------------------------------------------------------------------------------------|----------------------------------------------------------------------------------|
| Effect of uncertainty                                                | 24 | Describe how uncertainty about analytic judgments, inputs, or projections affect findings. Report the effect of choice of discount rate and time horizon, if applicable. | “Sensitivity analysis”                                                           |
| Effect of engagement with patients and others affected by the study  | 25 | Report on any difference patient/service recipient, general public, community, or stakeholder involvement made to the approach or findings of the study                  | “Base case input data and sensitivity analysis”,<br>“Exemplary input parameters” |
| <b>DISCUSSION</b>                                                    |    |                                                                                                                                                                          |                                                                                  |
| Study findings, limitations, generalizability, and current knowledge | 26 | Report key findings, limitations, ethical or equity considerations not captured, and how these could impact patients, policy, or practice.                               | “Discussion”                                                                     |
| <b>OTHER RELEVANT INFORMATION</b>                                    |    |                                                                                                                                                                          |                                                                                  |
| Source of funding                                                    | 27 | Describe how the study was funded and any role of the funder in the identification, design, conduct, and reporting of the analysis                                       | “Acknowledgements”                                                               |
| Conflicts of interest                                                | 28 | Report authors conflicts of interest according to journal or International Committee of Medical Journal Editors requirements.                                            | “Competing interests”                                                            |

NA= Not applicable

The checklist is Open Access distributed in accordance with the terms of the Creative Commons Attribution (CC BY 4.0) license, which permits others to distribute, remix, adapt and build upon this work, for commercial use, provided the original work is properly cited. See: <http://creativecommons.org/licenses/by/4.0/>.

## Supplementary Figure 1: TreeAge Pro model structure

The TreeAge Pro model structure shows the modelling and implementation of the cohort-based state-transition Markov model in TreeAge Pro. **a** shows the branch for “Treatment 1 – Without DiGA”, **b** shows the branch “Treatment 2 – With DiGA standard of care” and **c** shows the branch for “Treatment 3 – With DiGA future scenario”. The model structure shows possible patients’ journeys moving between the defined health states (mild depression, moderate depression, severe depression, remission, death). Purple cycle with white M in the middle = Markov tree node; green circle = chance tree node; red triangle = terminal tree node; # = used for one of the branch probabilities, which is calculated as the complement of the sum of all other probability expressions of that node; Init = Initial; Incr = Incremental; for detailed variable description see Table 2 in the manuscript.

**a**

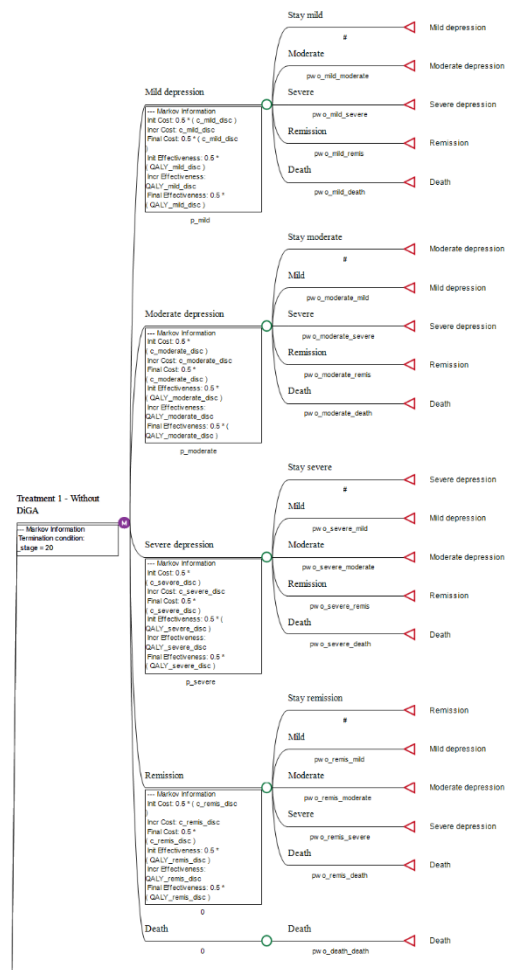

b

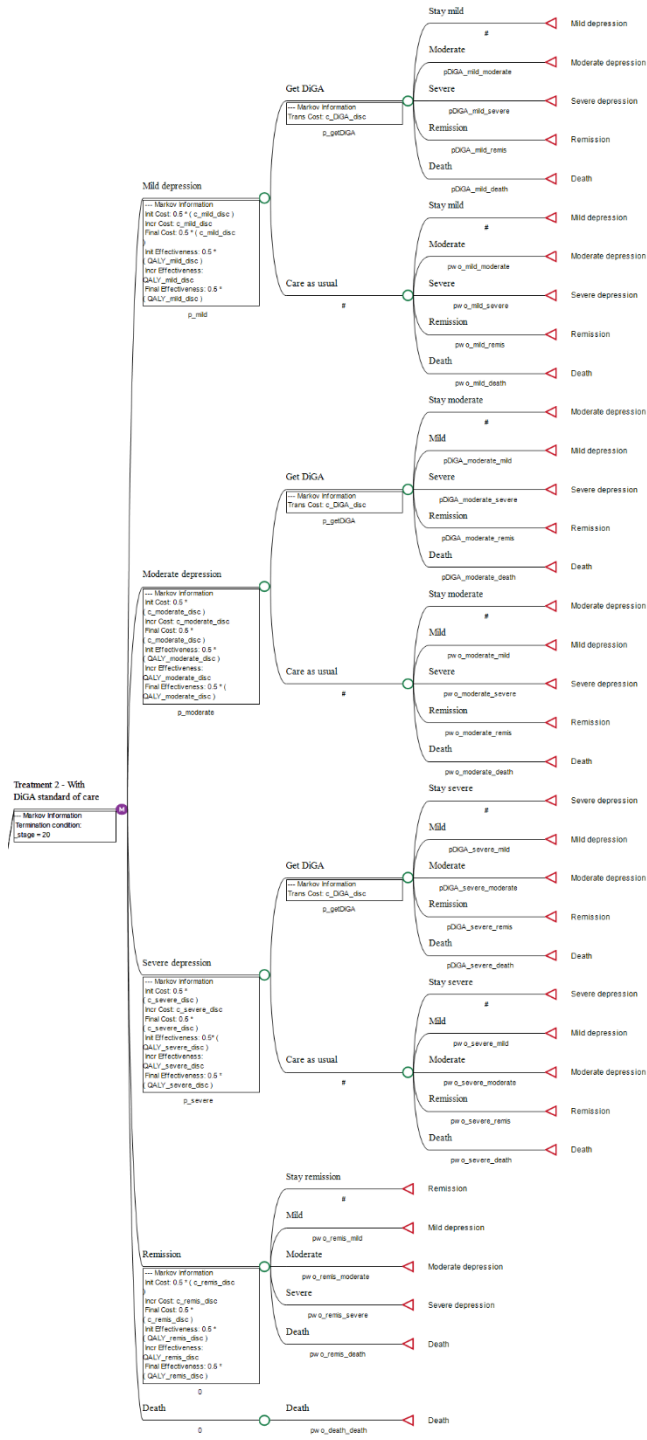

C

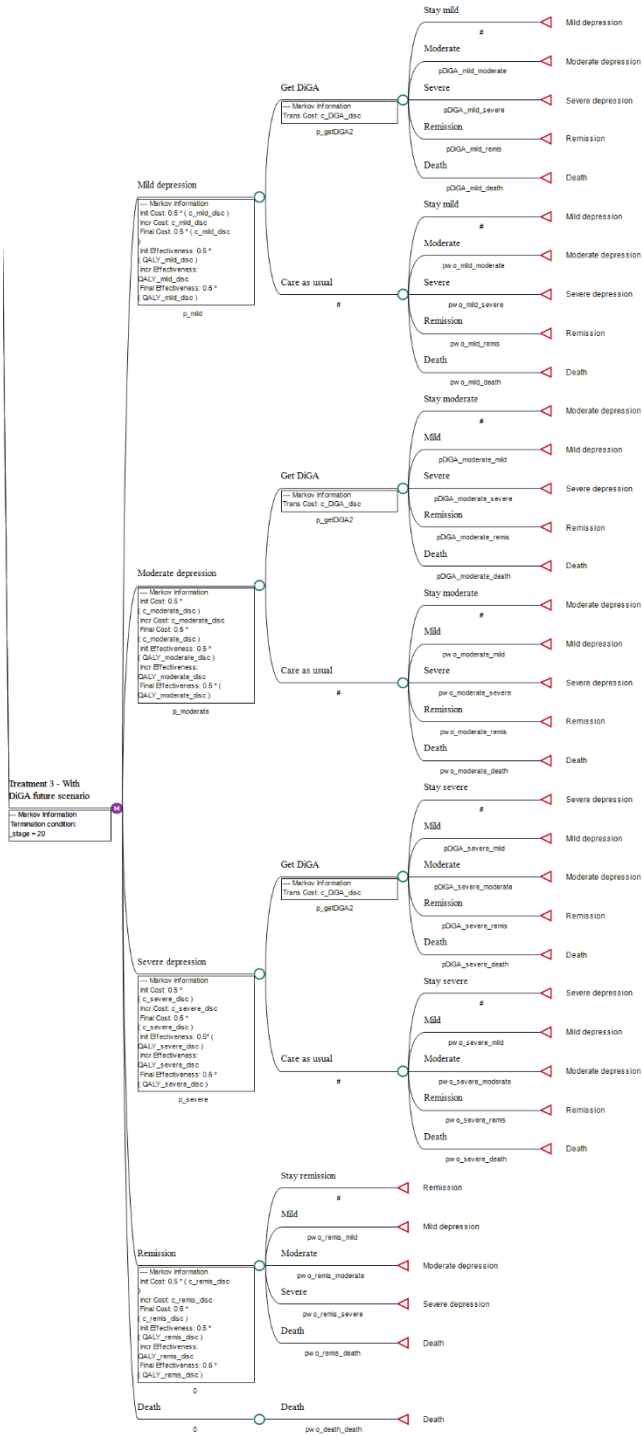



## Supplementary Table 3: Overview of included DiGA studies

DiGA studies permanently accepted in DiGA registry

Indication in scope: Depression

Last updated: 17.10.2023

| DiGA information |                                                                 |                      | Medical study (positive care effect) <sup>1</sup>                                                                                                                                                                                                                                                       |                                                                                                                                                                                                                                                                                                    |                                                                                                                                                                        |                                                                                                           |                                                    |                                                                                                             | Outcomes                             |                                                                           |                                                      |                                     | Conclusion for CMM                                                                                                                                                                                           |                                                                                                                                                                                       | DiGA cost                             |  |
|------------------|-----------------------------------------------------------------|----------------------|---------------------------------------------------------------------------------------------------------------------------------------------------------------------------------------------------------------------------------------------------------------------------------------------------------|----------------------------------------------------------------------------------------------------------------------------------------------------------------------------------------------------------------------------------------------------------------------------------------------------|------------------------------------------------------------------------------------------------------------------------------------------------------------------------|-----------------------------------------------------------------------------------------------------------|----------------------------------------------------|-------------------------------------------------------------------------------------------------------------|--------------------------------------|---------------------------------------------------------------------------|------------------------------------------------------|-------------------------------------|--------------------------------------------------------------------------------------------------------------------------------------------------------------------------------------------------------------|---------------------------------------------------------------------------------------------------------------------------------------------------------------------------------------|---------------------------------------|--|
| DiGA name        | Company name                                                    | Approved indications | Authors names                                                                                                                                                                                                                                                                                           | Publication year                                                                                                                                                                                                                                                                                   | Paper title                                                                                                                                                            | Journal                                                                                                   | DOI                                                | Study type                                                                                                  | Primary outcome measures             | Primary outcome measure improvement through DiGA [absolute <sup>2</sup> ] | Primary outcome measure improvement through DiGA [%] | Time measure period of intervention | Secondary outcome measures                                                                                                                                                                                   | Calculated average transition probability improvement [%]                                                                                                                             | Quarterly cost for using a DiGA [EUR] |  |
| Deprexis         | GAIA AG                                                         | F32.0                | Jan Philipp Klein; Thomas Berger; Johanna Schröder; Christina Späth; Björn Meyer; Franz Caspar; Wolfgang Lutz; Alice Arndt; Wolfgang Greiner; Viola Gräfe; Martin Hautzinger; Kristina Fuhr; Matthias Rose; Sandra Nolte; Bernd Löwe; Gerhard Andersson; Erik Vettorazzi; Steffen Moritz; Fritz Hohagen | 2016                                                                                                                                                                                                                                                                                               | Effects of a Psychological Internet Intervention in the Treatment of Mild to Moderate Depressive Symptoms: Results of the EVIDENT Study, a Randomized Controlled Trial | Psychotherapy and Psychosomatics                                                                          | 10.1159/000445355                                  | Randomized controlled trial (RCT)                                                                           | PHQ-9 (patient health questionnaire) | 1,61                                                                      | -18%                                                 | 3 months                            | GAD-7 (generalized anxiety disorder) PHQ-15 (patient health questionnaire - 15 items) SF-12 (short form health survey-12) ZUF-8 (patient satisfaction questionnaire) HAQ-11 (helping alliance questionnaire) | -18%                                                                                                                                                                                  | 210,00 €                              |  |
|                  |                                                                 | F32.1                |                                                                                                                                                                                                                                                                                                         | Björn Meyer; Julia Bierbrodt; Johanna Schröder; Thomas Berger; Christopher G. Beevers; Mario Weiss; Gitta Jacob; Christina Späth; Gerhard Andersson; Wolfgang Lutz; Martin Hautzinger; Bernd Löwe; Matthias Rose; Fritz Hohagen; Franz Caspar; Wolfgang Greiner; Steffen Moritz; Jan Philipp Klein | 2014                                                                                                                                                                   | Effects of an Internet intervention (Deprexis) on severe depression symptoms: Randomized controlled trial | Internet Interventions                             | <a href="http://dx.doi.org/10.1016/j.invent.2014.12.003">http://dx.doi.org/10.1016/j.invent.2014.12.003</a> | Randomized controlled trial (RCT)    | PHQ-9 (patient health questionnaire)                                      | 3,56                                                 | -26%                                | 3 months                                                                                                                                                                                                     | GAD-7 (generalized anxiety disorder) PHQ-15 (patient health questionnaire - 15 items) SF-12 - physical (short form health survey - 12) SF-12 - mental (short form health survey - 12) | -26%                                  |  |
|                  |                                                                 | F32.2                |                                                                                                                                                                                                                                                                                                         |                                                                                                                                                                                                                                                                                                    | 2012                                                                                                                                                                   | A randomized controlled trial of internet-based therapy in depression                                     | Behaviour Research and Therapy                     | <a href="https://doi.org/10.1016/j.brat.2012.04.006">https://doi.org/10.1016/j.brat.2012.04.006</a>         | Randomized controlled trial (RCT)    | BDI (Beck depression inventory)                                           | 5,16                                                 | -20%                                | 8 months                                                                                                                                                                                                     | DAS (Dysfunctional attitude scale) RSE (Rosenberg Self-Esteem Scale) SBQ-R (Suicide Behaviors Questionnaire-Revised) WHO Quality of Life (WHOQOL-BREF) Subjective benefit             | -20%                                  |  |
| F33.0            | Rico Krämer; Lea Köhne-Volland; Anna Schumacher; Stephan Köhler | 2022                 | Efficacy of a Web-Based Intervention for Depressive Disorders: Three-Arm Randomized Controlled Trial Comparing Guided and Unguided Self-Help With Waitlist Control                                                                                                                                      | JMIR Formative Research                                                                                                                                                                                                                                                                            | 10.2196/34330                                                                                                                                                          | Randomized controlled trial (RCT)                                                                         | BDI-II (Beck Depression Inventory-II) <sup>3</sup> | 11,77                                                                                                       | -39%                                 | 3 months                                                                  | BAI: Beck Anxiety Inventory                          | -39%                                | 217,18 €                                                                                                                                                                                                     |                                                                                                                                                                                       |                                       |  |
| F33.1            |                                                                 |                      |                                                                                                                                                                                                                                                                                                         |                                                                                                                                                                                                                                                                                                    |                                                                                                                                                                        |                                                                                                           |                                                    |                                                                                                             |                                      |                                                                           |                                                      |                                     |                                                                                                                                                                                                              |                                                                                                                                                                                       |                                       |  |

|                   |                   |                                                             |                                                                                           |      |                                                                                                                    |                                                                                                                |                        |                                                |                                                     |                                                     |             |          |                                                        |                                                                                                                                                                                                                                                                    |             |                 |
|-------------------|-------------------|-------------------------------------------------------------|-------------------------------------------------------------------------------------------|------|--------------------------------------------------------------------------------------------------------------------|----------------------------------------------------------------------------------------------------------------|------------------------|------------------------------------------------|-----------------------------------------------------|-----------------------------------------------------|-------------|----------|--------------------------------------------------------|--------------------------------------------------------------------------------------------------------------------------------------------------------------------------------------------------------------------------------------------------------------------|-------------|-----------------|
| Novogo Depression | IVP Networks GmbH | F32.0<br>F32.1<br>F32.2<br>F33.0<br>F33.1<br>F33.2<br>F34.1 | Till Beiwinkel; Tabea Eißing; Nils-Torge Telle; Elisabeth Siegmund-Schultze; Wulf Rössler | 2017 | Effectiveness of a Web-Based Intervention in Reducing Depression and Sickness Absence: Randomized Controlled Trial | Journal of Medical Internet Research                                                                           | 10.2196/jmir.6546      | Randomized controlled trial (RCT)              | PHQ-9 (Patient Health Questionnaire)                | 1,25                                                | -16%        | 0 months | MANSA (Manchester Short Assessment of Quality of Life) | -16%                                                                                                                                                                                                                                                               | 249,00 €    |                 |
|                   |                   |                                                             |                                                                                           |      |                                                                                                                    |                                                                                                                |                        | BDI-II (Beck Depression Inventory-II)          | 1,97                                                | -13%                                                | 0 months    |          | -13%                                                   |                                                                                                                                                                                                                                                                    |             |                 |
|                   |                   |                                                             |                                                                                           |      | 2016                                                                                                               | Effects of online intervention for depression on mood and positive symptoms in schizophrenia                   | Schizophrenia Research | http://dx.doi.org/10.1016/j.schres.2016.04.033 | Randomized controlled trial (RCT)                   | PHQ-9 (Patient Health Questionnaire) <sup>4,5</sup> | 3,7         | -32%     | 0 months                                               | Paranoia Checklist                                                                                                                                                                                                                                                 | -32%        |                 |
|                   |                   |                                                             |                                                                                           |      | 2019                                                                                                               | Can an Online Intervention for Depression Alleviate Emotional Problems and Pain? A Randomized Controlled Study | Verhaltens-therapie    | 10.1159/000501736                              | Randomized controlled trial (RCT)                   | BDI-II (Beck Depression Inventory-II) <sup>4</sup>  | 5,2         | -25%     | 0 months                                               | VAS (Visuelle Analogskala)<br>DSF (Deutscher Schmerzfragebogen)<br>URICA (University of Rhode Island Change Assessment Scale)<br>CEQ (Credibility/Expectancy Questionnaire)<br>ZUF-8 (Fragebogen zur Messung der Patientenzufriedenheit)<br>Subjective evaluations | -25%        |                 |
|                   |                   |                                                             |                                                                                           |      |                                                                                                                    |                                                                                                                |                        |                                                | PHQ-9 (Patient Health Questionnaire) <sup>4,5</sup> | 1,86                                                | -17%        | 0 months |                                                        | -17%                                                                                                                                                                                                                                                               |             |                 |
|                   |                   |                                                             |                                                                                           |      | 2023                                                                                                               | Studienbericht Novogo Depression                                                                               | n/a                    | n/a                                            | Randomized controlled trial (RCT)                   | BDI-II (Beck Depression Inventory-II) <sup>6</sup>  | 1,577       | -7%      | 3 months                                               | RSES (Rosenberg Self-Esteem Scale)<br>WHO-WOL-BREF (World Health Organization Quality of Life - BREF)                                                                                                                                                              | -7%         |                 |
|                   |                   |                                                             |                                                                                           |      |                                                                                                                    |                                                                                                                |                        |                                                | PHQ-9 (Patient Health Questionnaire) <sup>5,6</sup> | 0,755                                               | -7%         | 3 months |                                                        | -7%                                                                                                                                                                                                                                                                |             |                 |
|                   |                   | <b>Average PHQ-9</b>                                        |                                                                                           |      |                                                                                                                    |                                                                                                                |                        |                                                |                                                     |                                                     | <b>2,12</b> |          |                                                        |                                                                                                                                                                                                                                                                    | <b>-19%</b> | <b>225,39 €</b> |
|                   |                   | <b>Average BDI / BDI-II</b>                                 |                                                                                           |      |                                                                                                                    |                                                                                                                |                        |                                                |                                                     |                                                     | <b>5,14</b> |          |                                                        |                                                                                                                                                                                                                                                                    | <b>-21%</b> |                 |

- 1 Listed by the manufacturer and publicly available, intention to treat sample data (if available)
- 2 Calculated as absolute difference of outcome measure of control group versus intervention/DIGA group
- 3 Unguided group (without additional psychotherapy)
- 4 Outcome measures read from graphs in the publication, per protocol data
- 5 Secondary outcome but listed for reasons of comparability between the studies
- 6 Mixed effects model for repeated measures

Limitation: Different time measure periods after intervention and different design of control group

## Supplementary material references

1. Siebert, U. *et al.* State-transition modeling: a report of the ISPOR-SMDM Modeling Good Research Practices Task Force--3. *Value Health* **15**, 812–820 (2012).
2. Husereau, D. *et al.* Consolidated Health Economic Evaluation Reporting Standards 2022 (CHEERS 2022) Statement: Updated Reporting Guidance for Health Economic Evaluations. *Value Health* **25**, 3–9 (2022).
